# Supplementary material
Source: publisher figshare collection journal article supplement (https://frontiersin.figshare.com/ndownloader/files/24765176)
Supplement: Supplementary file [file 24765176]

|             |        | 6-Jul |       |       | 11-Jul |       |       | 20-Jul |       |       |
|-------------|--------|-------|-------|-------|--------|-------|-------|--------|-------|-------|
|             |        | D     | W     | PC    | D      | W     | PC    | D      | W     | PC    |
| Composition | 6-Jul  | D     |       |       |        |       |       |        |       |       |
|             |        | W     | 0.452 |       |        |       |       |        |       |       |
|             |        | PC    | 0.414 | 0.452 |        |       |       |        |       |       |
|             | 11-Jul | D     | 0.308 | 0.414 | 0.271  |       |       |        |       |       |
|             |        | W     | 0.129 | 0.216 | 0.116  | 0.452 |       |        |       |       |
|             |        | PC    | 0.321 | 0.414 | 0.363  | 0.452 | 0.414 |        |       |       |
|             | 20-Jul | D     | 0.069 | 0.069 | 0.041  | 0.069 | 0.069 | 0.069  |       |       |
|             |        | W     | 0.116 | 0.116 | 0.069  | 0.116 | 0.116 | 0.069  | 0.414 |       |
|             |        | PC    | 0.321 | 0.414 | 0.414  | 0.414 | 0.312 | 0.414  | 0.069 | 0.084 |
| Structure   | 6-Jul  | D     |       |       |        |       |       |        |       |       |
|             |        | W     | 0.372 |       |        |       |       |        |       |       |
|             |        | PC    | 0.362 | 0.372 |        |       |       |        |       |       |
|             | 11-Jul | D     | 0.177 | 0.362 | 0.147  |       |       |        |       |       |
|             |        | W     | 0.09  | 0.206 | 0.085  | 0.372 |       |        |       |       |
|             |        | PC    | 0.211 | 0.362 | 0.206  | 0.372 | 0.362 |        |       |       |
|             | 20-Jul | D     | 0.085 | 0.085 | 0.051  | 0.085 | 0.085 | 0.085  |       |       |
|             |        | W     | 0.109 | 0.147 | 0.085  | 0.089 | 0.147 | 0.089  | 0.362 |       |
|             |        | PC    | 0.206 | 0.362 | 0.3    | 0.362 | 0.206 | 0.362  | 0.078 | 0.102 |

**Supplementary Figure S3.** Adjusted  $p$ -values (composition, structure) of pairwise comparisons from the significant interaction term (Day:Treatment) for vegetative tissue in the three transplant treatments (dry, watered, procedural control). Shaded values are not significant ( $p > 0.05$ ).
